# Supplementary material for: The Development of a Rabies Virus-Vectored Vaccine against Borrelia burgdorferi, Targeting BBI39
Source: MDPI journal article supplement (doi:10.3390/vaccines12010078), 2024-01-12
Supplement: s1 [file s1]

a.

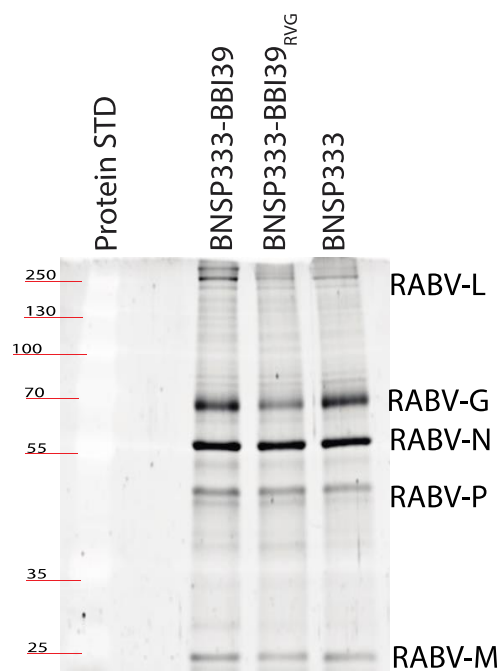

**Supplementary Figure S1:**

**SDS-PAGE protein gel of RABV-based constructs.**

(a) Protein gel of sucrose purified virions showing all RABV proteins.

a.

### Day 56 BBI39 EC50 Females and Males

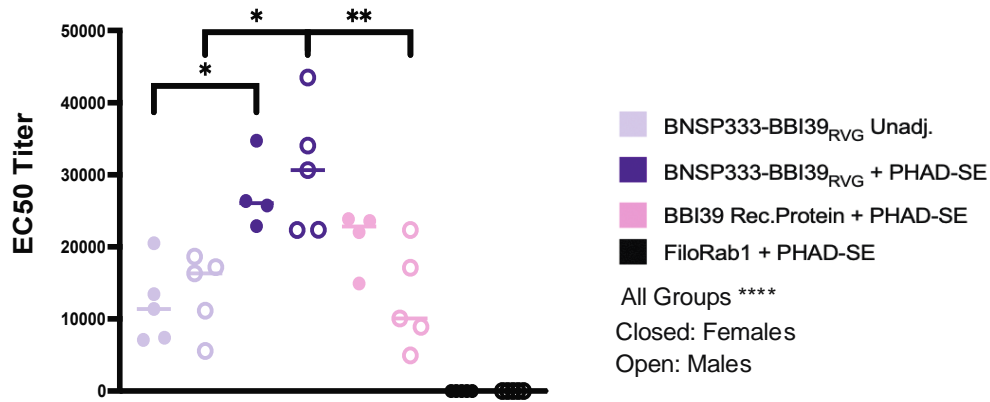

### Supplementary Figure S2

#### Sex differences in antibody titers from vaccinated female and male mice

(a) anti-BBI39 total IgG EC50 titers for comparing male and female vaccinated mice. Statistics were calculated by one-way ANOVA with post hoc Tukey's test of log-transformed data.  $p > (ns)$ ,  $p < 0.0332$  (\*),  $p < 0.0021$  (\*\*),  $p < 0.0002$  (\*\*\*),  $p < 0.0001$  (\*\*\*\*).

a.

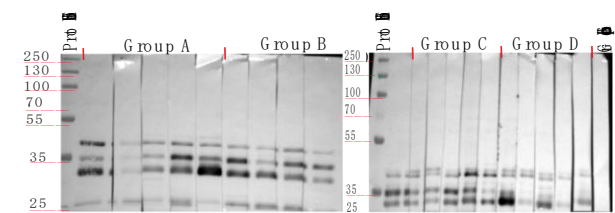

b.

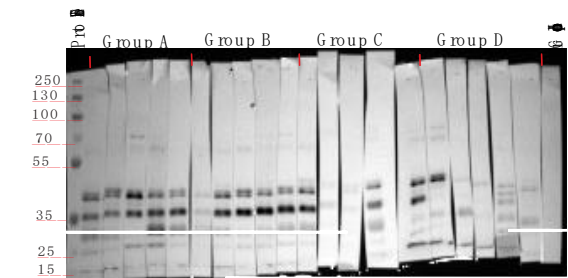

c.

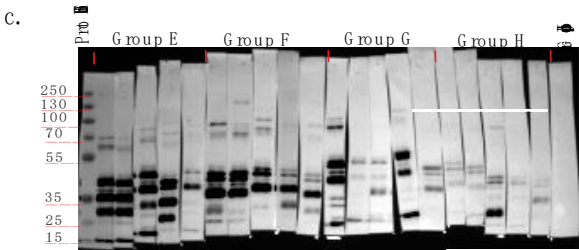

d.

|             | Groups                                    | Number of Infected Mice |       |       |
|-------------|-------------------------------------------|-------------------------|-------|-------|
|             |                                           | Heart                   | Joint | Skin  |
| Group A/E   | BNSP333-BBI39 <sub>RVG</sub> Unadjuvanted | 7/15                    | 7/15  | 11/15 |
| Group B/F   | BNSP333-BBI39 <sub>RVG</sub> + PHAD-SE    | 4/15                    | 8/15  | 11/15 |
| Group C/G   | BBI39 Protein + PHAD-SE                   | 9/15                    | 10/15 | 12/15 |
| Group D/H   | FiloRab1 + PHAD-SE                        | 15/15                   | 15/15 | 15/15 |
| Group E/I/J | Unvaccinated/Unchallenged                 | 0/15                    | 0/15  | 0/15  |

Supplementary Figure S3

*Borrelia burgdorferi* depletion in infected organs by culture in BSK and confirmation of infection by western blot.

(a-c) Western blot analysis of infected mice by serum. Whole borrelial lysates ran on gel and transferred to nitrocellulose membrane. Probed with individual infected mouse serum from 2 separate experiments of female (a-b) and male (c) mice. (d) Number of infected mouse organs by culture in BSK-H medium numerated under dark field microscopy for presence of *Borrelia*.

a.

|             |                                                                                   | Number of Infected Mice                   |       |       |      |
|-------------|-----------------------------------------------------------------------------------|-------------------------------------------|-------|-------|------|
|             |                                                                                   | Groups                                    | Heart | Joint | Skin |
| G r o u p A |  | BNSP333-BBI39 <sub>RVG</sub> Unadjuvanted | 3/5   | 3/5   | 4/5  |
| G r o u p B |  | BNSP333-BBI39 <sub>RVG</sub> + PHAD-SE    | 5/5   | 2/5   | 2/5  |
| G r o u p C |  | BBI39 Protein + PHAD-SE                   | 4/5   | 1/5   | 4/5  |
| G r o u p D |  | FiloRab1 + PHAD-SE                        | 5/5   | 5/5   | 5/5  |
| G r o u p E |  | Unvaccinated/Unchallenged                 | 0/5   | 0/5   | 0/5  |

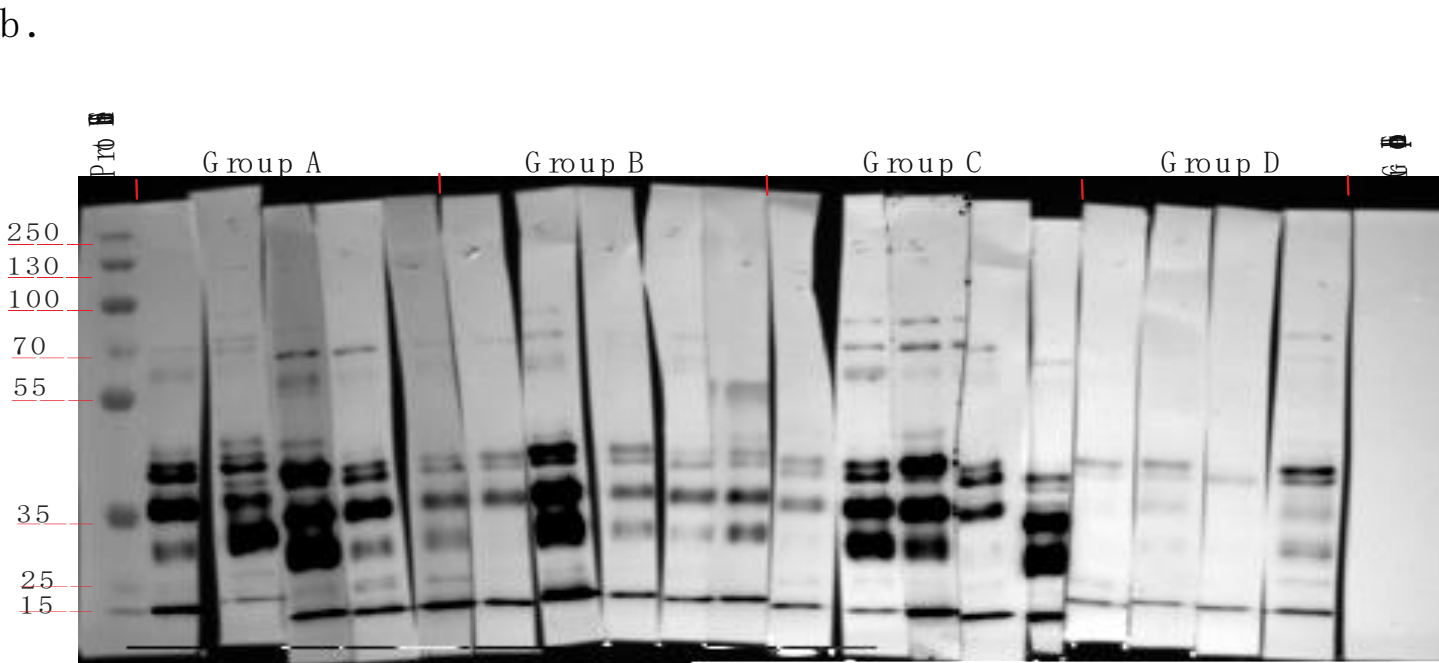

Supplementary Figure S4

Long-term vaccination and challenge organ culture and western blot analysis.

(a-b) ELISA curves for anti-BBI39 and anti-RABV-G from individual mouse serum 8 months (224 days) post-initial immunization. Determination of EC50 titers in Figure 7.

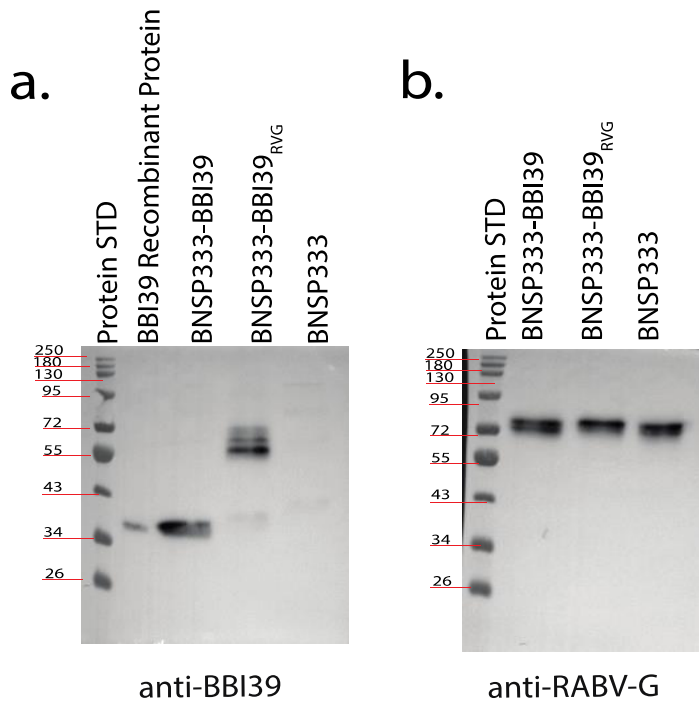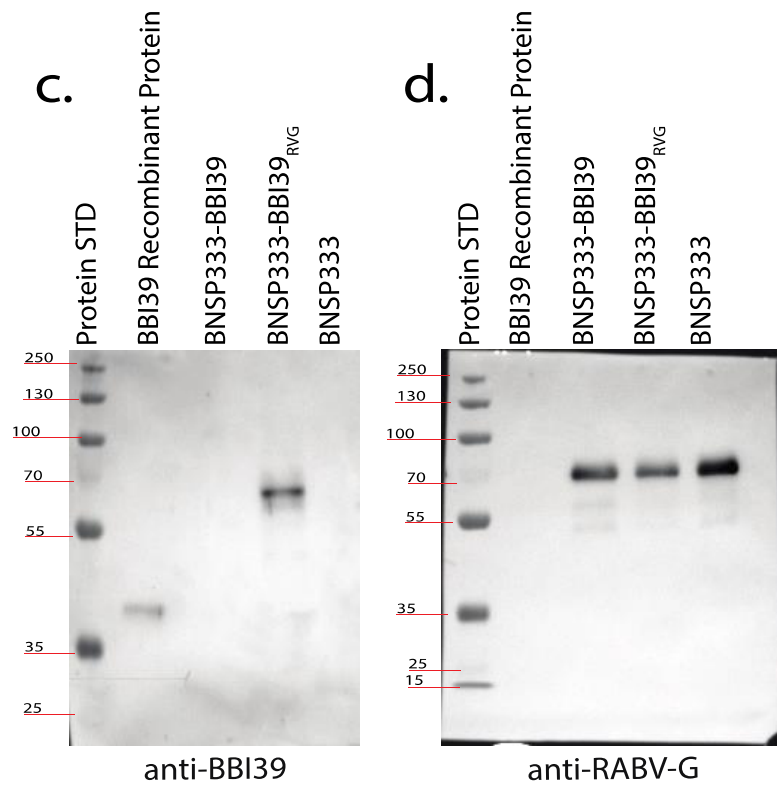

**Supplementary Figure S5:**

**Raw data of western blots from Figure 2.**

Western blot from Figure 2b (a-b) and Figure 2d (c-d).
